# Supplementary material for: Encapsulation of charged halogens by the 512 water cage
Source: Royal Society of Chemistry journal article supplement (doi:10.1039/d4cp01340a), 2024-01-01
Supplement: d4cp01340a2.pdf [file d4cp01340a2.pdf]

# Encapsulation of charged halogens by the $5^{12}$ water cage

Sara Gómez,<sup>†</sup> Elizabeth Florez,<sup>‡</sup> Nancy Acelas,<sup>‡</sup> Chiara Cappelli,<sup>†</sup>  
Cacier Hadad,<sup>¶</sup> and Albeiro Restrepo<sup>¶</sup>

<sup>†</sup>*Scuola Normale Superiore, Classe di Scienze, Piazza dei Cavalieri 7, 56126, Pisa, Italy*

<sup>‡</sup>*Grupo de Materiales con Impacto, Mat&mpac. Facultad de Ciencias Básicas, Universidad de Medellín, Medellín, Colombia*

<sup>¶</sup>*Instituto de Química, Universidad de Antioquia UdeA, Calle 70 No. 52-21, Medellín, Colombia*

\*Correspondence: sara.gomezmayas@sns.it, albeiro.restrepo@udea.edu.co

## Supplementary Information

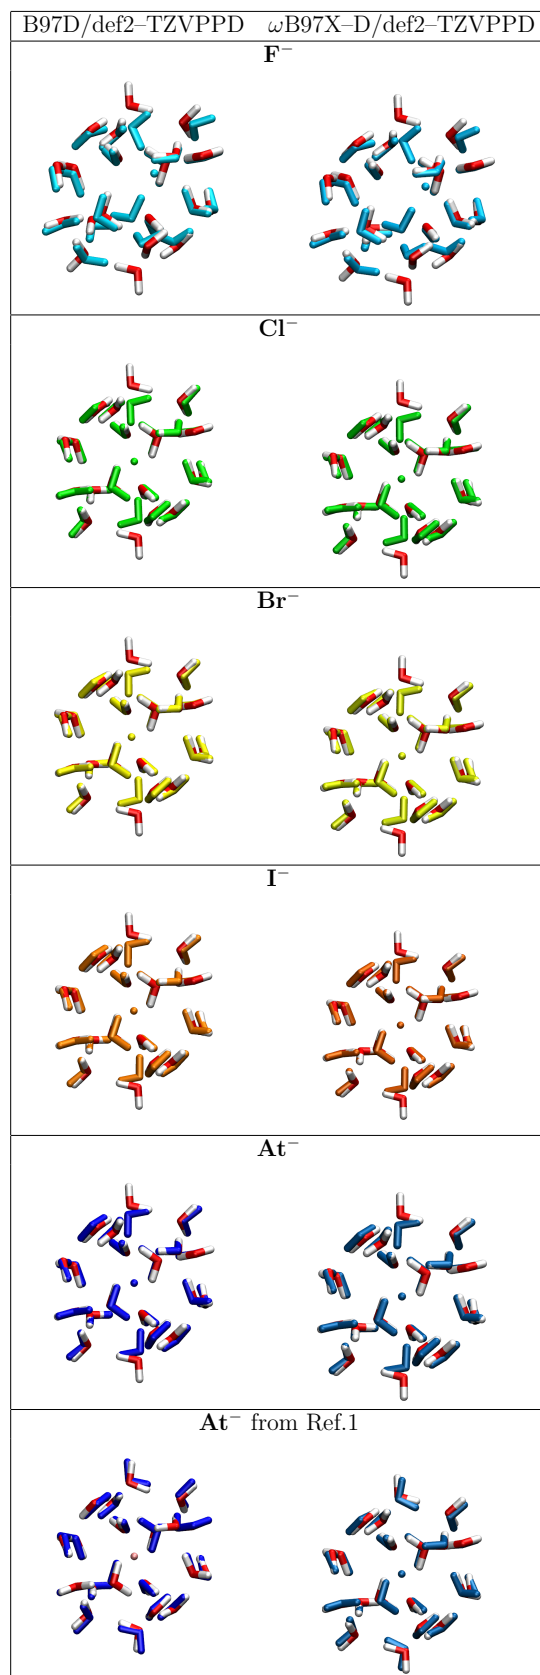

Figure S1: Superimposition of the structures of the  $[X@(\text{H}_2\text{O})_{20}]^-$  clusters ( $X = \text{F}, \text{Cl}, \text{I}, \text{Br}, \text{At}$ ) and the  $5^{12}$  bare cavity (red and white atoms). Geometries at the B97D/def2-TZVPPD (left) and  $\omega$ B97X-D/def2-TZVPPD (right) levels of theory.

Table S1: Interaction and deformation energies in kcal/mol for the  $[X@(\text{H}_2\text{O})_{20}]^-$  clusters,  $X = \text{F}, \text{Cl}, \text{Br}, \text{I}, \text{At}$ . RMSD (in Å) with respect to the pristine cage and charge densities in  $\text{C}/\text{mm}^3$  extracted from Refs. 2, 3 for the isolated anions are also listed. Level of theory: DLPNO-CCSD(T1)/def2-TZVPPD// $\omega$ B97X-D/def2-TZVPPD with TightPNO truncation setup. Extrapolated DLPNO-CCSD(T1) energies to CBS via TZ/QZ are also provided. Two  $[\text{At}@(\text{H}_2\text{O})_{20}]^-$  structures are included: one with no proton switch to the interior of the cage obtained here and in Ref. 1 and a hand constructed structure with two protons facing the interior of the cavity (see Figure 1)

| Anion                 | $E_{int}$ | $E_{int,CBS}$ | $E_{def}$ | $E_{def,CBS}$ | $E_{int}^*$ | $E_{int,CBS}^*$ | Charge density | RMSD |
|-----------------------|-----------|---------------|-----------|---------------|-------------|-----------------|----------------|------|
| $\text{F}^-$          | -69.7     | -72.0         | 29.2      | 29.6          | -98.8       | -101.6          | 22.7           | 0.92 |
| $\text{Cl}^-$         | -42.7     | -41.3         | 14.6      | 14.5          | -57.3       | -55.8           | 8.2            | 0.55 |
| $\text{Br}^-$         | -39.0     | -37.5         | 14.6      | 14.6          | -53.6       | -52.2           | 6.3            | 0.51 |
| $\text{I}^-$          | -34.4     | -30.6         | 15.0      | 15.1          | -49.4       | -45.7           | 4.4            | 0.47 |
| $\text{At}^-$         | -32.0     | -27.5         | 15.4      | 15.5          | -47.4       | -43.0           | 3.2            | 0.46 |
| $\text{At}^-$ (Ref.1) | -22.3     | -16.7         | 11.4      | 11.1          | -33.7       | -27.9           | 3.2            | 0.19 |

Table S2: Interaction and deformation energies in kcal/mol for the  $[\text{Ng}@(\text{H}_2\text{O})_{20}]$  clusters,  $X = \text{Ne}, \text{Ar}, \text{Kr}, \text{Xe}$ . RMSD (in Å) with respect to the pristine cage. Level of theory: B97D/def2-TZVPPD.

| Noble gas | $E_{int}$ | $E_{def}$ | $E_{int}^*$ | RMSD |
|-----------|-----------|-----------|-------------|------|
| Ne        | -2.0      | 0.0       | -2.0        | 0.01 |
| Ar        | -3.2      | 0.0       | -3.2        | 0.01 |
| Kr        | -5.0      | 0.0       | -5.0        | 0.01 |
| Xe        | -5.9      | 0.1       | -5.8        | 0.01 |

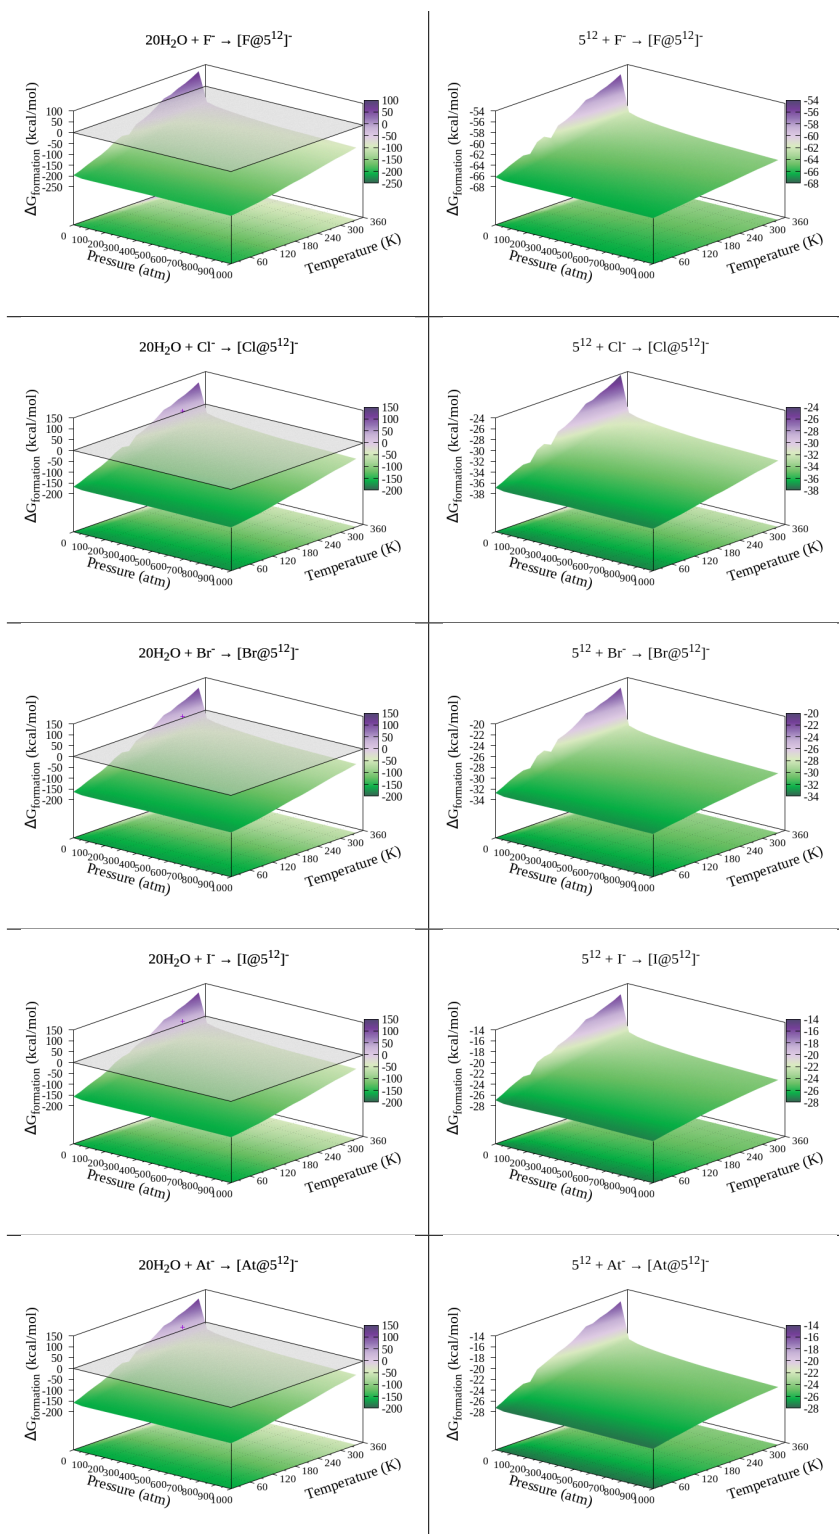

Figure S2: Thermal stability of the  $[X@(\text{H}_2\text{O})_{20}]^-$  cluster towards dissociation into  $20\text{H}_2\text{O} + \text{X}^-$  ( $X = \text{F}, \text{Cl}, \text{I}, \text{Br}, \text{At}$ ) on the left and towards the  $5^{12}$  cavity +  $\text{X}^-$  on the right. All calculations are performed in the gas phase at the B97D/def2-TZVPPD level of theory. Points (+) mark the  $\Delta G_{\text{formation}}$  values at  $T = 298 \text{ K}$  and  $P = 1 \text{ atm}$ .

## References

- [1] S. Gómez; E. Flórez; N. Acelas; C. Hadad; A. Restrepo, Encapsulation of Astatide by a water cage. *Phys. Chem. Chem. Phys.* **2023**, *25*, 12284–12289.
- [2] R. D. Shannon, Revised effective ionic radii and systematic studies of interatomic distances in halides and chalcogenides. *Acta Crystallogr., Sect. A: Cryst. Phys., Diffr., Theor. Gen. Crystallogr.* **1976**, *32*, 751–767.
- [3] J. Emsley, *The Elements*; Oxford Chemistry Guides; Clarendon Press, 1998.
